# Supplementary material for: MEF2A Is the Trigger of Resveratrol Exerting Protection on Vascular Endothelial Cell
Source: Front Cardiovasc Med. 2022 Jan 3;8:775392. doi: 10.3389/fcvm.2021.775392 (PMC8762055; doi:10.3389/fcvm.2021.775392)
Supplement: Supplementary file 4 [file Table_1.XLS]

## Sheet: 板1 - Sheet1
				treatment with resveratrol for 12 hours
				1 st
			concentration of reveratrol	0	0.625	1.25	2.5	5	10	20
			OD450	0.862	0.807	0.806	0.796	0.79	0.647	0.505
			OD450	0.868	0.889	0.805	0.884	0.83	0.72	0.558
			OD450	0.863	0.825	0.818	0.782	0.855	0.71	0.546
				2 nd
			concentration of reveratrol	0	0.625	1.25	2.5	5	10	20
			OD450	0.825	0.802	0.998	0.898	0.844	0.564	0.483
			OD450	0.843	0.874	0.849	0.828	0.909	0.647	0.508
			OD450	0.853	0.821	0.804	0.859	0.868	0.622	0.527
				3 rd
			concentration of reveratrol	0	0.625	1.25	2.5	5	10	20
			OD450	0.998	0.968	0.865	0.854	0.971	0.689	0.562
			OD450	0.948	0.931	0.888	0.814	2.856	0.695	0.616
			OD450	0.925	0.885	0.905	0.843	0.958	0.698	0.591
				treatment with resveratrol for 24 hours
				1 st
			concentration of reveratrol	0	0.625	1.25	2.5	5	10	20
软件版本	2.00.20		OD450	0.621	0.565	0.667	0.624	0.563	0.406	0.299
			OD450	0.686	0.56	0.607	0.649	0.463	0.435	0.299
板编号	板1		OD450	0.604	0.669	0.658	0.614	0.594	0.457	0.297
日期	2020-04-18			2 nd
时间	1899-12-31 12:44:31		concentration of reveratrol	0	0.625	1.25	2.5	5	10	20
检测仪类型:	Epoch		OD450	0.564	0.684	0.66	0.6	0.591	0.446	0.313
检测仪序列号:	266729		OD450	0.536	0.695	0.573	0.71	0.596	0.485	0.31
检测类型	检测仪		OD450	0.644	0.651	0.653	0.711	0.651	0.456	0.296
				3 rd
程序详细信息			concentration of reveratrol	0	0.625	1.25	2.5	5	10	20
板类型	96 WELL PLATE		OD450	0.813	0.724	0.766	0.724	0.796	0.574	0.376
检测	吸收光 终点		OD450	0.875	0.773	0.632	0.692	0.739	0.633	0.457
	全板		OD450	0.737	0.759	0.702	0.675	0.692	0.622	0.49
	波长: 450
	检测速度: 正常, 延迟: 100 msec, 测量值/数据点: 8			treatment with resveratrol for 48 hours
				1st
			concentration of reveratrol	0	0.625	1.25	2.5	5	10	20
			OD450	0.798	0.8	0.852	0.886	0.83	0.573	0.37
			OD450	0.803	0.827	0.831	0.875	0.864	0.553	0.397
			OD450	0.834	0.857	0.999	1.028	0.943	0.594	0.385
			OD450	0.776	0.819	0.887	0.884	0.929	0.605	0.381
			OD450	0.781	0.718	0.856	0.875	0.799	0.572	0.335
				2 nd
			concentration of reveratrol	0	0.625	1.25	2.5	5	10	20
			OD450	0.847	0.8	0.871	0.829	0.914	0.676	0.391
			OD450	0.877	0.866	0.877	0.879	0.829	0.545	0.304
			OD450	0.946	0.867	0.754	0.927	0.891	0.657	0.303
				3rd
			concentration of reveratrol	0	0.625	1.25	2.5	5	10	20
			OD450	0.883	0.707	0.783	0.832	0.877	0.497	0.314
			OD450	0.776	0.752	0.822	0.791	0.949	0.563	0.344
			OD450	0.765	0.721	0.815	0.798	0.893	0.559	0.307
